# Supplementary material
Source: PubMed Central journal article supplement (PMC4811150)
Supplement: JCI81129.sd.pdf [file JCI81129.sd.pdf]

**Supplemental Table 1 – List of proteins selectively enriched in exosomes (Exos) and shed microvesicles (sMV).**

|                                              | <b>Category</b>                   | <b>Gene Name<sup>D</sup></b>                                   | <b>Protein Description<sup>D</sup></b>                           |
|----------------------------------------------|-----------------------------------|----------------------------------------------------------------|------------------------------------------------------------------|
| <b>Enriched proteins in Exos<sup>A</sup></b> | <i>ESCRTs</i>                     | TSG101*                                                        | Tumor susceptibility gene 101                                    |
|                                              |                                   | VPS37B                                                         | Vacuolar protein sorting-associated protein 37B                  |
|                                              |                                   | CHMP2A                                                         | Charged multivesicular body protein 2a                           |
|                                              | <i>ESCRT accessory</i>            | PDCD6IP/Alix                                                   | Programmed cell death 6 interacting protein                      |
|                                              | <i>Tetraspanins</i>               | CD63*                                                          | CD63 antigen                                                     |
|                                              |                                   | CD82                                                           | CD82 antigen                                                     |
|                                              |                                   | CD151                                                          | CD151 antigen                                                    |
|                                              |                                   | TSPAN3*                                                        | Tetraspanin-3                                                    |
|                                              | <i>RNA binding proteins</i>       | TSPNA6*                                                        | Tetraspanin-6                                                    |
|                                              |                                   | RPL13                                                          | 60S ribosomal protein L13                                        |
|                                              |                                   | RPL26                                                          | 60S ribosomal protein L26                                        |
|                                              |                                   | RPS25                                                          | 40S ribosomal protein S25                                        |
|                                              | <i>Cargo selection</i>            | RPS4Y1                                                         | 40S ribosomal protein S4, Y isoform 1                            |
|                                              |                                   | RPS4Y2                                                         | 40S ribosomal protein S4, Y isoform 2                            |
|                                              |                                   | NEDD4                                                          | E3 ubiquitin-protein ligase NEDD4                                |
|                                              |                                   | NEDD4L                                                         | E3 ubiquitin-protein ligase NEDD4-like                           |
|                                              | <i>Trafficking / sorting</i>      | SDCBP                                                          | Syndecan-binding protein 1                                       |
|                                              |                                   | ARRDC1                                                         | Arrestin domain-containing protein 1                             |
|                                              |                                   | RAB1B                                                          | Ras-related protein Rab-1B                                       |
|                                              |                                   | RAB5A                                                          | Ras-related protein Rab-5A                                       |
|                                              |                                   | RAB5B                                                          | Ras-related protein Rab-5B                                       |
|                                              |                                   | RAB8A                                                          | Ras-related protein Rab-8A                                       |
| RAB11A                                       |                                   | Ras-related protein Rab-11A                                    |                                                                  |
| RAB11B                                       | Ras-related protein Rab-11B       |                                                                |                                                                  |
| <i>Integral membrane proteins</i>            | ITGAV                             | Integrin alpha-V                                               |                                                                  |
|                                              | ADAM10*                           | Disintegrin and metalloproteinase domain-containing protein 10 |                                                                  |
|                                              | IGSF8                             | Immunoglobulin superfamily member 8 (CD81 partner 3)           |                                                                  |
|                                              | EPHB3                             | Ephrin type-B receptor 3                                       |                                                                  |
| <i>GPI-anchor</i>                            | GPC1                              | Glypican-1                                                     |                                                                  |
| <b>Enriched proteins in sMVs<sup>B</sup></b> | <i>RNA binding proteins</i>       | HNRNPH1*                                                       | Heterogeneous nuclear ribonucleoprotein H                        |
|                                              |                                   | HNRNPL*                                                        | heterogeneous nuclear ribonucleoprotein L                        |
|                                              |                                   | PABPC1                                                         | Polyadenylate-binding protein 1                                  |
|                                              |                                   | CALR                                                           | Calreticulin                                                     |
|                                              |                                   | CPNE3                                                          | CPNE3 protein                                                    |
|                                              | <i>ABC transporters</i>           | ABCE1                                                          | ATP-binding cassette sub-family E member 1                       |
|                                              | <i>Mitochondrial proteins</i>     | VDAC1*                                                         | voltage-dependent anion channel 1                                |
|                                              |                                   | VDAC2*                                                         | Voltage-dependent anion-selective channel protein 2              |
|                                              |                                   | PHB2*                                                          | Prohibitin-2                                                     |
|                                              |                                   | PDIA4*                                                         | Protein disulfide-isomerase A4                                   |
|                                              |                                   | ATP5O*                                                         | ATP synthase subunit O, mitochondrial                            |
|                                              | <i>Integral membrane proteins</i> | SLC25A3*                                                       | Phosphate carrier protein, mitochondrial                         |
|                                              |                                   | CKAP4                                                          | Cytoskeleton-associated protein 4                                |
|                                              | <i>Cytoskeleton / microtubule</i> | MYO1D                                                          | Unconventional myosin-1d                                         |
|                                              |                                   | MYO6                                                           | Unconventional myosin-1d                                         |
|                                              |                                   | FLNB                                                           | Filamin-B                                                        |
|                                              |                                   | RACGAP1*                                                       | Rac GTPase activating protein 1                                  |
|                                              |                                   | KIF23*                                                         | Kinesin-like protein KIF23                                       |
|                                              | <i>Enzymes</i>                    | TPM3                                                           | Tropomyosin alpha-3 chain                                        |
|                                              |                                   | AARS                                                           | Alanine--tRNA ligase, cytoplasmic                                |
|                                              |                                   | ATIC                                                           | Bifunctional purine biosynthesis protein PURH                    |
|                                              |                                   | ATP5A1                                                         | ATP synthase subunit alpha                                       |
|                                              |                                   | ERO1L                                                          | ERO1-like protein alpha                                          |
|                                              | <i>Chaperones</i>                 | GNB2                                                           | Guanine nucleotide-binding protein G(I)/G(S)/G(T) subunit beta-2 |
|                                              |                                   | CSE1L                                                          | Exportin-2                                                       |
|                                              | <b>Commonly</b>                   | <i>ESCRTs</i>                                                  | VPS28                                                            |
| <i>ESCRT accessory</i>                       |                                   | VPS4B                                                          | Vacuolar protein sorting-associated protein 4B                   |

| identified proteins in Exos and sMV <sup>c</sup> | Category  | CD9                                            | CD9 antigen |
|--------------------------------------------------|-----------|------------------------------------------------|-------------|
|                                                  |           | <i>Tetraspanins</i>                            | CD81        |
| <i>RNA binding proteins</i>                      | TSPAN8    | Tetraspanin-8                                  |             |
|                                                  | HNRNPC    | Heterogeneous nuclear ribonucleoproteins C     |             |
|                                                  | HNRNPE1   | Heterogeneous nuclear ribonucleoprotein E1     |             |
|                                                  | HNRNPE2   | Heterogeneous nuclear ribonucleoprotein E2     |             |
|                                                  | HNRNPD    | Heterogeneous nuclear ribonucleoprotein D0     |             |
|                                                  | HNRNPK    | Heterogeneous nuclear ribonucleoprotein K      |             |
|                                                  | HNRNPA2B1 | Heterogeneous nuclear ribonucleoproteins A2/B1 |             |
|                                                  | ANXA2     | Annexin A2                                     |             |
| <i>ABC transporters</i>                          | EEF2      | Elongation factor 2                            |             |
|                                                  | ABCB1     | Multidrug resistance protein 1                 |             |
| <i>Mitochondrial proteins</i>                    | ABCG2     | ATP-binding cassette sub-family G member 2     |             |
|                                                  | GLUD1     | Glutamate dehydrogenase 1                      |             |
| <i>Trafficking / sorting</i>                     | RAB21     | Ras-related protein Rab-21                     |             |
|                                                  | RAB14     | Ras-related protein Rab-14                     |             |
|                                                  | RAB15     | Ras-related protein Rab-15                     |             |
|                                                  | RAB1A     | Ras-related protein Rab-1A                     |             |
|                                                  | RAB35     | Ras-related protein Rab-35                     |             |
|                                                  | RAB43     | Ras-related protein Rab-43                     |             |
|                                                  | RAB13     | Ras-related protein Rab-13                     |             |
|                                                  | RAB8B     | Ras-related protein Rab-8B                     |             |
|                                                  | FLOT2     | Flotillin-2                                    |             |
|                                                  | CD44      | CD44 antigen                                   |             |
| <i>Integral membrane proteins</i>                | FASN      | Fatty acid synthase                            |             |
|                                                  | EMMPRIN   | Extracellular matrix metalloproteinase inducer |             |
|                                                  | ITGA2     | Integrin alpha-2                               |             |
|                                                  | EPHB1     | Ephrin type-B receptor 1                       |             |
|                                                  | EPHA2     | Ephrin type-A receptor 2                       |             |
|                                                  | EPHB2     | Ephrin type-B receptor 2                       |             |
|                                                  | EPHB4     | Ephrin type-B receptor 4                       |             |
|                                                  | EPHA6     | Ephrin type-A receptor 6                       |             |
| <i>Cytoskeleton / microtubule</i>                | EPHA7     | Ephrin type-A receptor 7                       |             |
|                                                  | MYH9      | Myosin-9                                       |             |
|                                                  | MYH14     | Myosin-14                                      |             |
|                                                  | ACTB      | Actin, cytoplasmic 1                           |             |
|                                                  | TUBB2C    | Tubulin beta-2C chain                          |             |
|                                                  | TUBB      | Tubulin, beta                                  |             |
|                                                  | TUBA1B    | Tubulin alpha-1B chain                         |             |
|                                                  | EZR       | Ezrin                                          |             |
| <i>Heat shock proteins</i>                       | IQGAP1    | Ras GTPase-activating-like protein             |             |
|                                                  | HSP90AA1  | Heat shock protein HSP 90-alpha                |             |
|                                                  | HSP90AB1  | Heat shock protein HSP 90-beta                 |             |
| <i>Enzymes</i>                                   | HSPA8     | Heat shock 70 kDa protein 8                    |             |
|                                                  | GAPDH     | Glyceraldehyde-3-phosphate dehydrogenase       |             |
|                                                  | ACLY      | ATP-citrate synthase                           |             |
| <i>Chaperones</i>                                | ENO1      | Alpha-enolase                                  |             |
|                                                  | YWHAE     | 14-3-3 protein epsilon                         |             |
|                                                  | YWHAZ     | 14-3-3 protein zeta                            |             |

A Exos enriched: protein selection category based on references: [1-8]. Raw mass spectrometry data is deposited in the PeptideAtlas and can be accessed at <http://www.peptideatlas.org/PASS/PASS00749>

B sMV enriched: protein selection category based on references [1,6]. Raw mass spectrometry data is deposited in the PeptideAtlas and can be accessed at <http://www.peptideatlas.org/PASS/PASS00749>

C Co-Exos and sMV enriched: protein selection category based on references: [1-8]

D Identified gene and protein information can be obtained from <http://www.ncbi.nlm.nih.gov/gene> and [www.uniprot.com](http://www.uniprot.com)

\* Proteins that we consider specific markers for Exos and sMVs (based on unique/predominant expression in purified EV types)

## References

1. Xu R, Greening DW, Rai A, *et al.* Highly-purified exosomes and shed microvesicles isolated from the human colon cancer cell line LIM1863 by sequential centrifugal ultrafiltration are biochemically and functionally distinct. *Methods*. 87(11-21) (2015).
2. Tauro BJ, Greening DW, Mathias RA, *et al.* Comparison of ultracentrifugation, density gradient separation, and immunoaffinity capture methods for isolating human colon cancer cell line LIM1863-derived exosomes. *Methods*. 56(2), 293-304 (2012).
3. Ji H, Greening DW, Barnes TW, *et al.* Proteome profiling of exosomes derived from human primary and metastatic colorectal cancer cells reveal differential expression of key metastatic factors and signal transduction components. *Proteomics*. 13(10-11), 1672-1686 (2013).
4. Tauro BJ, Mathias RA, Greening DW, *et al.* Oncogenic H-ras reprograms Madin-Darby canine kidney (MDCK) cell-derived exosomal proteins following epithelial-mesenchymal transition. *Mol Cell Proteomics*. 12(8), 2148-2159 (2013).
5. Mathivanan S, Lim JW, Tauro BJ, *et al.* Proteomics analysis of A33 immunoaffinity-purified exosomes released from the human colon tumor cell line LIM1215 reveals a tissue-specific protein signature. *Mol Cell Proteomics*. 9(2), 197-208 (2010).
6. Tauro BJ, Greening DW, Mathias RA, *et al.* Two distinct populations of exosomes are released from LIM1863 colon carcinoma cell-derived organoids. *Mol Cell Proteomics*. 12(3), 587-598 (2013).
7. Lim JW, Mathias RA, Kapp EA, *et al.* Restoration of full-length APC protein in SW480 colon cancer cells induces exosome-mediated secretion of DKK-4. *Electrophoresis*. 33(12), 1873-1880 (2012).
8. Ji H, Erfani N, Tauro BJ, *et al.* Difference gel electrophoresis analysis of Ras-transformed fibroblast cell-derived exosomes. *Electrophoresis*. 29(12), 2660-2671 (2008).

**Supplemental Table 2 – Selected list of EV studies on biofluids.**

| <b>Biofluid type</b> | <b>Disease<br/>(and patient cohort)</b> | <b>EV isolation method<sup>A</sup></b>     | <b>Biofluid volume/<br/>EV particle concentration</b>                                       | <b>EV validation</b>                                               | <b>EV type<br/>(reported in study)</b> | <b>EV selection marker</b>                      | <b>Reference</b> |
|----------------------|-----------------------------------------|--------------------------------------------|---------------------------------------------------------------------------------------------|--------------------------------------------------------------------|----------------------------------------|-------------------------------------------------|------------------|
| <b>Plasma</b>        | Pancreatic cancer (n=8)                 | DC                                         | NT $\mu$ l,<br>Patient $\sim$ 0.035 pg MIF / $10^8$<br>Control $\sim$ 0.005 pg MIF / $10^8$ | Size: 100 nm (TEM/NTA)<br>MS: Alix, TSG101, CD63, CD81             | Exos                                   | MIF                                             | [1]              |
|                      | Breast cancer (n=50)                    | DC                                         | NT $\mu$ l<br>Patient 750 / $\mu$ l<br>Control 300/ $\mu$ l                                 | WB: CD9, Flotilin-2, MHC-I                                         | sMV                                    | FAK, EGFR                                       | [2]              |
|                      | Melanoma (n= 36)                        | 1.2 $\mu$ m, DC, 40% sucrose cushion (DGC) | NT $\mu$ l<br>Patient 0.0018 $\mu$ g/ $10^8$<br>Control 0.0004 $\mu$ g/ $10^8$              | Size : 100 nm (TEM)<br>WB: GAPDH                                   | Exos                                   | TYRP2, VLA-4, HSP70, MET                        | [3]              |
|                      | Glioblastomas (n=30)                    | 0.8 $\mu$ m, 0.20 $\mu$ m, DC, $\mu$ NMR   |                                                                                             | Size: 100 nm (TEM)<br>CD63                                         | Exos                                   | EGFR, EGFR vIII,                                | [4]              |
|                      | Ovarian cancer (n=22)                   | 0.22 $\mu$ m, DC                           | 300 $\mu$ l                                                                                 | Size: 100 nm (SEM)<br>WB: LAMP-1                                   | Exos                                   | MAGE 3/6, TGF- $\beta$ 1                        | [5]              |
|                      | Ovarian cancer (n=63)                   | DC                                         | 200 $\mu$ l                                                                                 | Size: 100 nm (TEM)<br>Density: 1.18 g/mL                           | Exos                                   | CLDN4                                           | [6]              |
|                      | Lung cancer (n=10)                      | ExoQuick                                   | 500 $\mu$ l                                                                                 |                                                                    | Exos                                   | miR-378a, miR-379, miR-139-5p, miR-200b-5p      | [7]              |
|                      | Gastric cancer (n= 37)                  | DC                                         |                                                                                             | Size: 10-800 nm (TEM, AFM, DLS)<br>FACS: Her-2/neu <sup>+</sup> MV | sMV                                    | Her-2/neu <sup>+</sup> MV mRNA MAGE-1 and Her-2 | [8]              |
|                      | Gastric cancer (n= 10)                  | Total Exosomes isolation reagent           | 300 $\mu$ l                                                                                 | Size: 100 nm (TEM)                                                 | Exos                                   | LINC00152                                       | [9]              |
|                      | Gastric cancer                          | ExoQuick                                   | 400 $\mu$ l                                                                                 | qRT-PCR, FISH                                                      | Exos                                   | miR-185, miR-20a,                               | [10]             |

|              |                                   |                        |                                                                                                                |                                                                                                           |            |                                                                                                          |      |
|--------------|-----------------------------------|------------------------|----------------------------------------------------------------------------------------------------------------|-----------------------------------------------------------------------------------------------------------|------------|----------------------------------------------------------------------------------------------------------|------|
|              | (n= 133)                          |                        |                                                                                                                |                                                                                                           |            | miR-210, miR-25, miR-92b                                                                                 |      |
|              | Leukaemia (n= 16)                 | 0.22 $\mu$ m, DC, SEC  | 9 mL<br>Patient: $5 \times 10^{13}$ particles/mL<br>Patient: $\sim 55 \mu$ g/mL<br>Control: $\sim 20 \mu$ g/mL | WB: CD81, TGF- $\beta$ 1<br>Density: $\sim 1.18$ g/mL<br>Size: 100 nm (TEM, NTA)<br>ELISA: TGF- $\beta$ 1 | Exos       | Exosomal TGF- $\beta$ 1                                                                                  | [11] |
|              | Healthy volunteers (n=57)         | Filtration             | 0.5 mL                                                                                                         | FACS (PS, CD63)<br>TEM (sMV's 100-1000 nm; Exos $\sim 100$ nm)<br>ELISA (TGF- $\beta$ )                   | Exos/sMV's | CD63 are enriched in exos compared with sMV's                                                            | [12] |
| <b>Serum</b> | Pancreatic cancer (n=190)         | 0.2 $\mu$ m filter, DC | 250 $\mu$ l,<br>Patient $\sim 2.5 \times 10^9$<br>Control $\sim 2.1 \times 10^9$                               | FACS: GPC1+ Exos<br>TEM: GPC1+ Exos/ CD9+ Exos<br>WB Flotilin 1<br>Size: 100 nm<br>Density: 1.19 g/mL     | Exos       | GPC1                                                                                                     | [13] |
|              | CHB (n=20), LC (n=20), HCC (n=20) | Exoquick (120 $\mu$ l) | 500 $\mu$ l Serum                                                                                              | WB: CD63, CD9                                                                                             | Exos       | High in HCC: miR-18a, miR-221, miR-222 and miR-224<br>Low in HCC: miR-101, miR-106b, miR-122 and miR-195 | [14] |
|              | Breast cancer (n=96)              | DC, DGC                | 3-6 mL serum<br>Patient $\sim 20 \mu$ g/mL<br>Control $\sim 5 \mu$ g/mL                                        | WB: ADAM10, CD9, CD24<br>Size: 100 nm (TEM)                                                               | Exos       | CD24                                                                                                     | [15] |
|              | Pancreatic cancer (n=131)         | DC, DGC                | 1-1.5 mL                                                                                                       | FACS: CD9, CD63                                                                                           | Exos       | CD44v6, Tspan8, EpCAM, MET, CD104, miR-1246, miR-4644, miR3976, miR-4306                                 | [16] |
|              | Pancreatic cancer (n=4)           | 0.2 $\mu$ m filter, DC | 500 $\mu$ l                                                                                                    | Size: 100 nm (NTA and TEM)<br>FACS: CD9, TSG101, CD63<br>WB: TSG101, CD63                                 | Exos       | Mutated <i>KRAS</i> and <i>p53</i> DNA                                                                   | [17] |
|              | Pancreatic cancer (n=5)           | Microfluidic (ExoChip) | 400 $\mu$ l                                                                                                    | WB: CD63, Rab5<br>Size: 30-300 nm (TEM)                                                                   | Exos       | CD63, Rab5, miRNAs profiles                                                                              | [18] |
|              | Breast cancer (n=11)              | 0.2 $\mu$ m filter, DC | 500 $\mu$ l<br>Patient $\sim 0.5 \times 10^9$                                                                  | Size: 100 nm (TEM, AFM, LLS, NTA)                                                                         | Exos       | Dicer, miR                                                                                               | [19] |

|                                   |                                                                               |                                              |                                                           |                                                                                                           |       |                                                                                                             |      |
|-----------------------------------|-------------------------------------------------------------------------------|----------------------------------------------|-----------------------------------------------------------|-----------------------------------------------------------------------------------------------------------|-------|-------------------------------------------------------------------------------------------------------------|------|
|                                   |                                                                               |                                              | Control $\sim 0.2 \times 10^9$                            | WB: TSG101, CD9, CD63                                                                                     |       |                                                                                                             |      |
|                                   | Breast cancer (n=168)                                                         | ExoQuick                                     | 400 $\mu$ l                                               | WB: CD63, Mucin1, GAPDH                                                                                   | Exos  | miR-101, miR-372, miR-373                                                                                   | [20] |
|                                   | Melanoma (n=21)                                                               | ExoQuick                                     | 200 $\mu$ l                                               | WB: CD63                                                                                                  | Exos  | miR-125b                                                                                                    | [21] |
|                                   | Hepatocellular carcinoma (n=30)                                               | Total Exosomes isolation reagent             |                                                           | Size: 100 nm (TEM)<br>WB: CD63, TSG101                                                                    | Exos  | miR-21                                                                                                      | [22] |
|                                   | Ovarian cancer (n=30)                                                         | DC                                           |                                                           | Size: 264-410 nm (TEM, NTA)<br>WB: VAMP3/ARF6                                                             | sMVVs | VAMP3<br>ARF6<br>MT1-MMP                                                                                    | [23] |
|                                   | Glioblastomas (n=30)                                                          | 0.22 $\mu$ m + DC                            | Serum                                                     | Size: 50-500 nm (TEM)                                                                                     | sMVVs | mRNA EGFRvIII,<br>miR-21                                                                                    | [24] |
| <i>Ascites</i>                    | Ovarian cancer (n=20), non-cancer (n=10)                                      | 0.22 $\mu$ m + nPLEX                         | Ascites ( $> 10^9$ exosomes per mL)                       | Size: $\sim 100$ nm (TEM)                                                                                 | Exos  | EPCAM, CD24                                                                                                 | [25] |
|                                   | Breast cancer<br>Ovarian cancer<br>Lung cancer                                | DC + sucrose cushion                         |                                                           | WB: ADAM 10, CD9<br>Size: 100 nm (TEM)                                                                    | Exos  | CD24/EPCAM in Ovarian carcinoma                                                                             | [15] |
| <i>Malignant pleural effusion</i> | Various cancers (Breast cancer, lung cancer, Ovarian)                         | DC, DGC                                      |                                                           | Size: 100 nm (TEM)                                                                                        | Exos  | 50 proteins identified including MHC-I, actin, G protein, HSP90, BTG1, Bamacan, PEDF, BTG-1, TSG14 and TSP2 | [26] |
|                                   | Various cancers (lung cancer, breast cancer, ovarian, melanoma, mesothelioma) | DC, DGC                                      |                                                           | Size: 100 nm (TEM), TEM (MHC-I and -II, TRP, gp100 and CD81), WB: (MHC-I and -II, MART-1, HER2 and HSC70) | Exos  | MART-1, TRP, gp100 and HER2                                                                                 | [27] |
| <i>Urine</i>                      | Healthy individuals (n=4)                                                     | DC; 0.22 $\mu$ m + DC; DC + sucrose cushion; | 250 mL $\sim 200 \times 10^{-6}$ mL CD9 <sup>+</sup> Exos | 1D-SDS-PAGE: THP<br>WB: Alix, TSG101,<br>RT-PCR: (miR-1207-5p, miR-192, mRNA AQP2, TSG101 and Alix)       | Exos  | mRNA AQP2,<br>miR-1207-5p, miR-192                                                                          | [28] |

|  |                                                |                               |      |                        |      |       |      |
|--|------------------------------------------------|-------------------------------|------|------------------------|------|-------|------|
|  |                                                | membrane filtration; ExoQuick |      |                        |      |       |      |
|  | BPH (n=5)<br>PCa (n=5)<br>Metastatic PCa (n=3) | DC                            | 5 mL | WB: Alix, ITGA3, ITGB1 | Exos | ITGA3 | [29] |

A DC; differential ultracentrifugation, DGC; density-gradient fractionation, SEC; size exclusion chromatography, Exos; exosome, sMVs; shed microvesicles, TEM; transmission electron microscopy, SEM; scanning electron microscopy, WB; western blotting, NTA; nanoparticle trafficking analysis, AFM; atomic force microscopy, MS; mass spectrometry, qRT-PCR; quantitative real-time polymerase chain reaction, FISH; fluorescence in situ hybridization, DLS; dynamic light scatter, ELISA; enzyme-linked immunosorbent assay, FACS; fluorescence-activated cell sorting, THP; tamm-horsfall protein, BPH; benign prostate hyperplasia, PCa; prostate cancer, CHB; chronic hepatitis B, LC; liver cirrhosis, HCC; hepatocellular carcinoma, nPLEX, nanoplasmonic exosomes sensor.

## References

- Costa-Silva B, Aiello NM, Ocean AJ, *et al.* Pancreatic cancer exosomes initiate pre-metastatic niche formation in the liver. *Nat Cell Biol.* 17(6), 816-826 (2015).
- Galindo-Hernandez O, Villegas-Comonfort S, Candanedo F, *et al.* Elevated concentration of microvesicles isolated from peripheral blood in breast cancer patients. *Arch Med Res.* 44(3), 208-214 (2013).
- Peinado H, Aleckovic M, Lavotshkin S, *et al.* Melanoma exosomes educate bone marrow progenitor cells toward a pro-metastatic phenotype through MET. *Nat Med.* 18(6), 883-891 (2012).
- Shao H, Min C, Issadore D, *et al.* Magnetic Nanoparticles and microNMR for Diagnostic Applications. *Theranostics.* 2(1), 55-65 (2012).
- Szajnik M, Derbis M, Lach M, *et al.* Exosomes in Plasma of Patients with Ovarian Carcinoma: Potential Biomarkers of Tumor Progression and Response to Therapy. *Gynecol Obstet (Sunnyvale).* Suppl 4(3) (2013).
- Li J, Sherman-Baust CA, Tsai-Turton M, *et al.* Claudin-containing exosomes in the peripheral circulation of women with ovarian cancer. *BMC Cancer.* 9(244) (2009).
- Cazzoli R, Buttitta F, Di Nicola M, *et al.* microRNAs derived from circulating exosomes as noninvasive biomarkers for screening and diagnosing lung cancer. *J Thorac Oncol.* 8(9), 1156-1162 (2013).
- Baran J, Baj-Krzyworzeka M, Weglarczyk K, *et al.* Circulating tumour-derived microvesicles in plasma of gastric cancer patients. *Cancer Immunol Immunother.* 59(6), 841-850 (2010).
- Li Q, Shao Y, Zhang X, *et al.* Plasma long noncoding RNA protected by exosomes as a potential stable biomarker for gastric cancer. *Tumour Biol.* 36(3), 2007-2012 (2015).
- Zhou X, Zhu W, Li H, *et al.* Diagnostic value of a plasma microRNA signature in gastric cancer: a microRNA expression analysis. *Sci Rep.* 5(11251) (2015).
- Hong CS, Muller L, Whiteside TL, *et al.* Plasma exosomes as markers of therapeutic response in patients with acute myeloid leukemia. *Front Immunol.* 5(160) (2014).
- Grant R, Ansa-Addo E, Stratton D, *et al.* A filtration-based protocol to isolate human plasma membrane-derived vesicles and exosomes from blood plasma. *J Immunol Methods.* 371(1-2), 143-151 (2011).

13. Melo SA, Luecke LB, Kahlert C, *et al.* Glypican-1 identifies cancer exosomes and detects early pancreatic cancer. *Nature*. 523(7559), 177-182 (2015).
14. Sohn W, Kim J, Kang SH, *et al.* Serum exosomal microRNAs as novel biomarkers for hepatocellular carcinoma. *Exp Mol Med*. 47(e184) (2015).
15. Rupp AK, Rupp C, Keller S, *et al.* Loss of EpCAM expression in breast cancer derived serum exosomes: role of proteolytic cleavage. *Gynecol Oncol*. 122(2), 437-446 (2011).
16. Madhavan B, Yue S, Galli U, *et al.* Combined evaluation of a panel of protein and miRNA serum-exosome biomarkers for pancreatic cancer diagnosis increases sensitivity and specificity. *Int J Cancer*. 136(11), 2616-2627 (2015).
17. Kahlert C, Melo SA, Protopopov A, *et al.* Identification of double-stranded genomic DNA spanning all chromosomes with mutated KRAS and p53 DNA in the serum exosomes of patients with pancreatic cancer. *J Biol Chem*. 289(7), 3869-3875 (2014).
18. Kanwar SS, Dunlay CJ, Simeone DM, *et al.* Microfluidic device (ExoChip) for on-chip isolation, quantification and characterization of circulating exosomes. *Lab Chip*. 14(11), 1891-1900 (2014).
19. Melo SA, Sugimoto H, O'Connell JT, *et al.* Cancer exosomes perform cell-independent microRNA biogenesis and promote tumorigenesis. *Cancer Cell*. 26(5), 707-721 (2014).
20. Eichelser C, Stuckrath I, Muller V, *et al.* Increased serum levels of circulating exosomal microRNA-373 in receptor-negative breast cancer patients. *Oncotarget*. 5(20), 9650-9663 (2014).
21. Alegre E, Sanmamed MF, Rodriguez C, *et al.* Study of circulating microRNA-125b levels in serum exosomes in advanced melanoma. *Arch Pathol Lab Med*. 138(6), 828-832 (2014).
22. Wang H, Hou L, Li A, *et al.* Expression of serum exosomal microRNA-21 in human hepatocellular carcinoma. *Biomed Res Int*. 2014(864894) (2014).
23. Clancy JW, Sedgwick A, Rosse C, *et al.* Regulated delivery of molecular cargo to invasive tumour-derived microvesicles. *Nat Commun*. 6(6919-6930) (2015).
24. Skog J, Wurdinger T, van Rijn S, *et al.* Glioblastoma microvesicles transport RNA and proteins that promote tumour growth and provide diagnostic biomarkers. *Nat Cell Biol*. 10(12), 1470-1476 (2008).
25. Im H, Shao H, Park YI, *et al.* Label-free detection and molecular profiling of exosomes with a nano-plasmonic sensor. *Nat Biotechnol*. 32(5), 490-495 (2014).
26. Bard MP, Hegmans JP, Hemmes A, *et al.* Proteomic analysis of exosomes isolated from human malignant pleural effusions. *Am J Respir Cell Mol Biol*. 31(1), 114-121 (2004).
27. Andre F, Scharz NE, Movassagh M, *et al.* Malignant effusions and immunogenic tumour-derived exosomes. *Lancet*. 360(9329), 295-305 (2002).
28. Alvarez ML, Khosroheidari M, Kanchi Ravi R, *et al.* Comparison of protein, microRNA, and mRNA yields using different methods of urinary exosome isolation for the discovery of kidney disease biomarkers. *Kidney Int*. 82(9), 1024-1032 (2012).
29. Bijnsdorp IV, Geldof AA, Lavaei M, *et al.* Exosomal ITGA3 interferes with non-cancerous prostate cell functions and is increased in urine exosomes of metastatic prostate cancer patients. *J Extracell Vesicles*. 2(eCollection 2013) (2013).
